# Supplementary material for: Implications of hepatitis C virus subtype 1a migration patterns for virus genetic sequencing policies in Italy
Source: PubMed Central journal article supplement (PMC5341469; doi:10.1186/s12862-017-0913-3), 2017-03-07

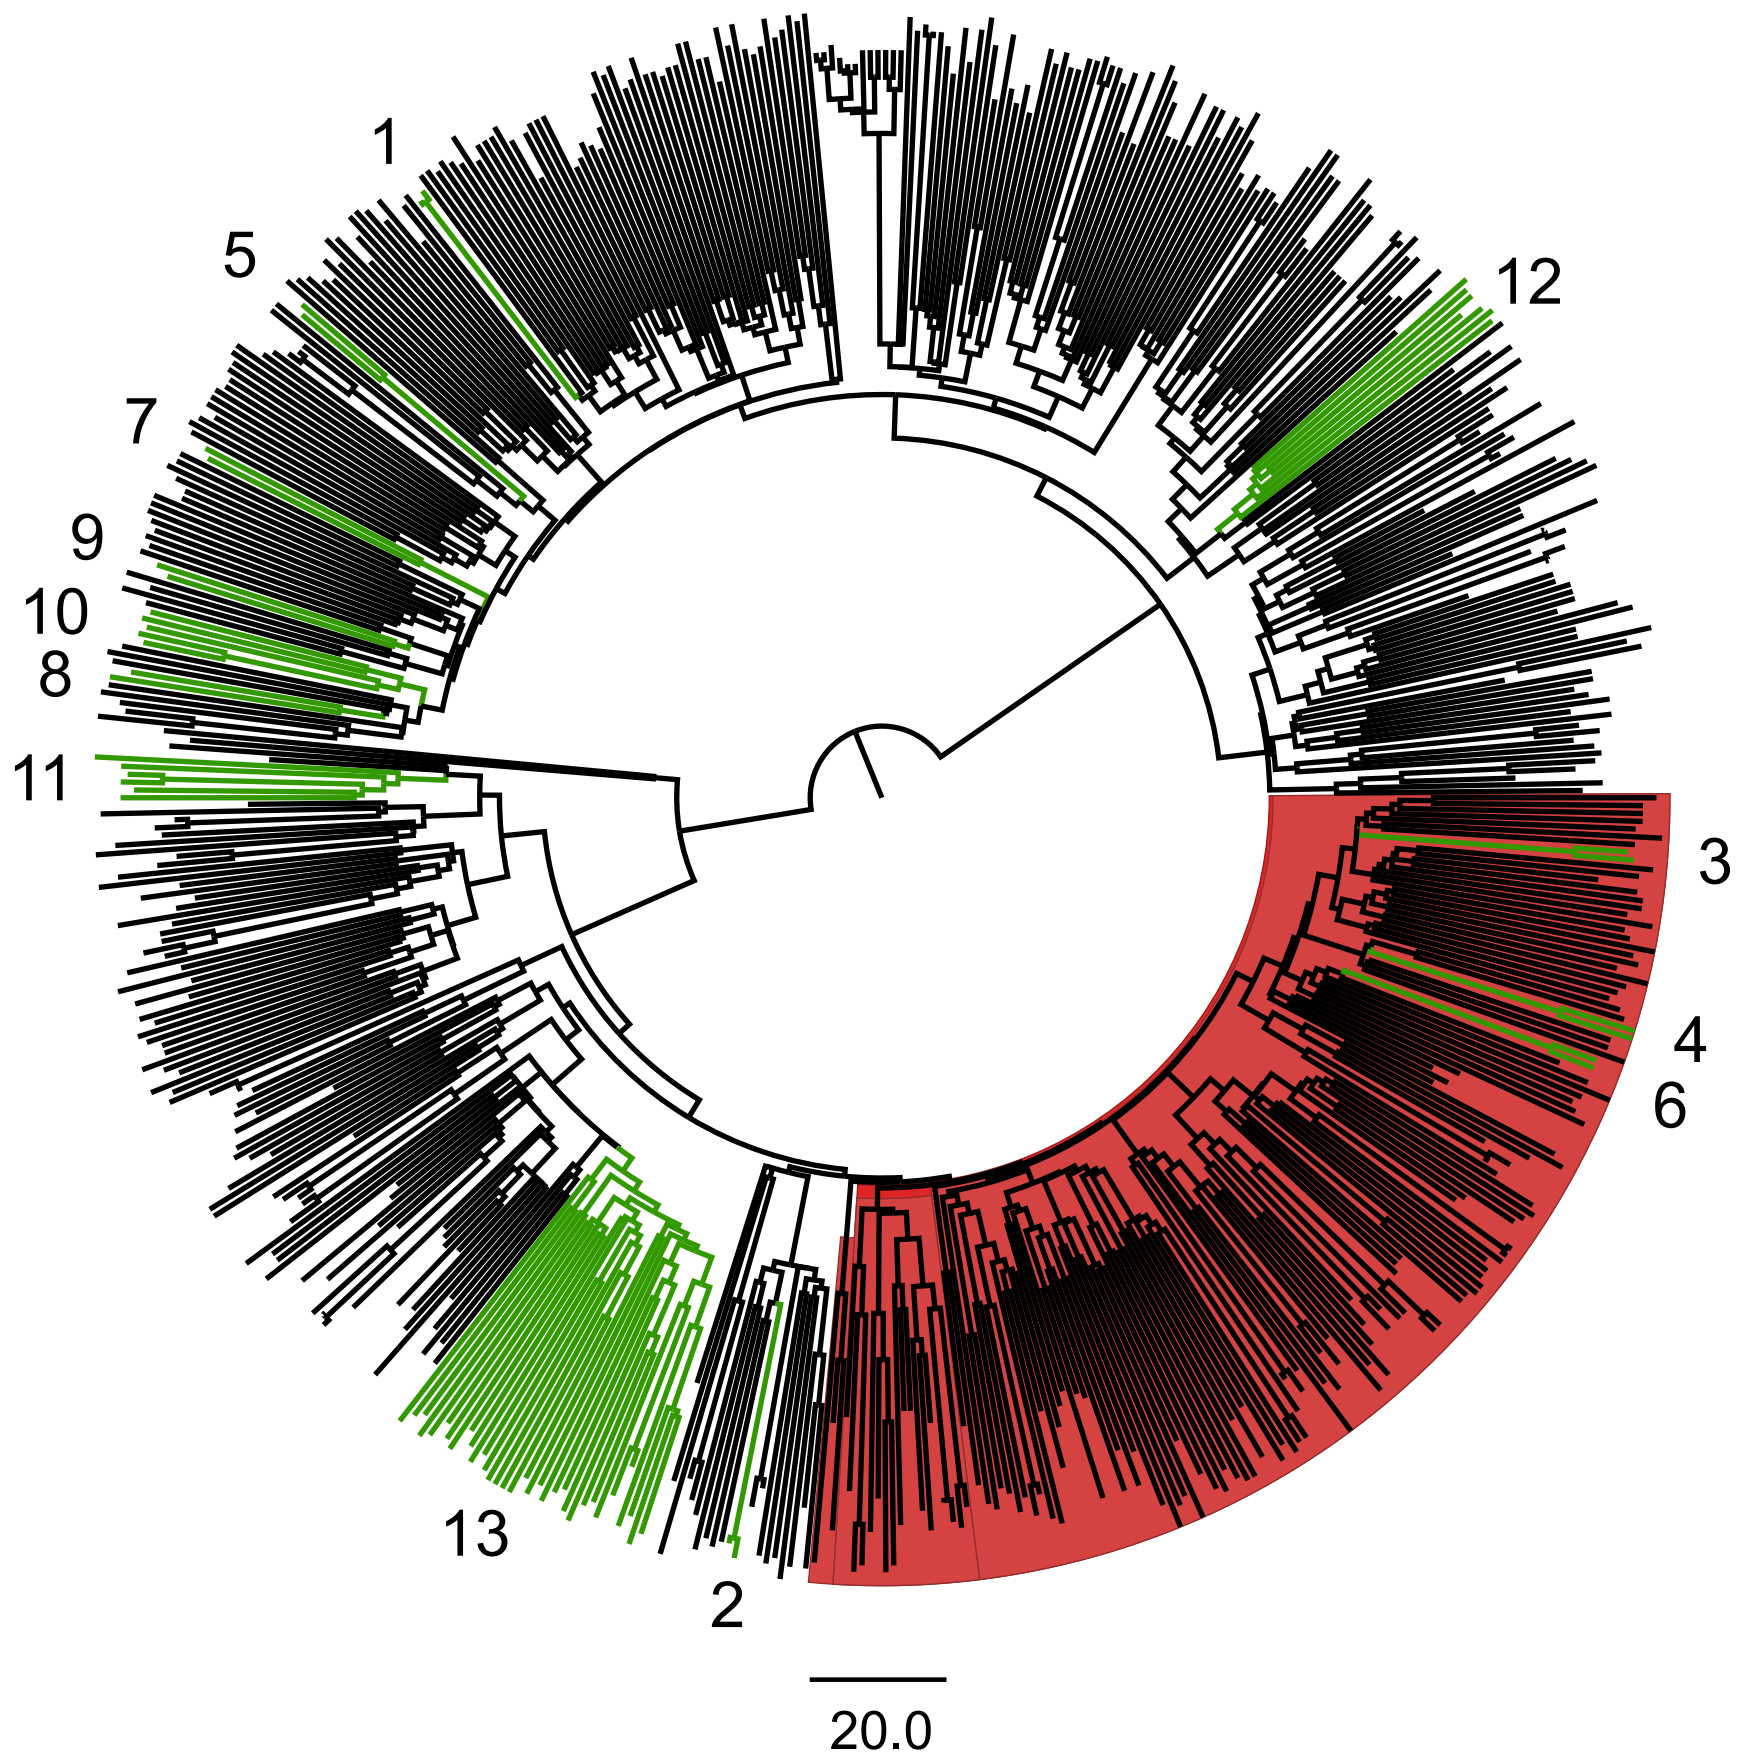

Supplement: 12862_2017_913_MOESM3_ESM.pdf [file 12862_2017_913_MOESM3_ESM.pdf]
